# Supplementary material for: Aberrant Promoter Hypermethylation of RASSF Family Members in Merkel Cell Carcinoma
Source: PubMed Central journal article supplement (PMC3875954; doi:10.3390/cancers5041566), 2013-11-18
Supplement: cancers-05-01566-s001.pdf [file cancers-05-01566-s001.pdf]

## Supplementary Materials

**Figure S1.** Promoter structure of RASSF2, RASSF5A, RASSF5C and RASSF10 for methylation analysis. RASSF family members RASSF2, RASSF5A, RASSF5C and RASSF10 are shown with their CpG island promoter structure. Black vertical lines represent single CpGs and restriction enzyme *TaqI* recognition sites are marked with star. Bent arrows indicate transcriptional start sites. Horizontal arrows mark PCR product and size for COBRA methylation analysis. The according PCR fragment size is indicated.

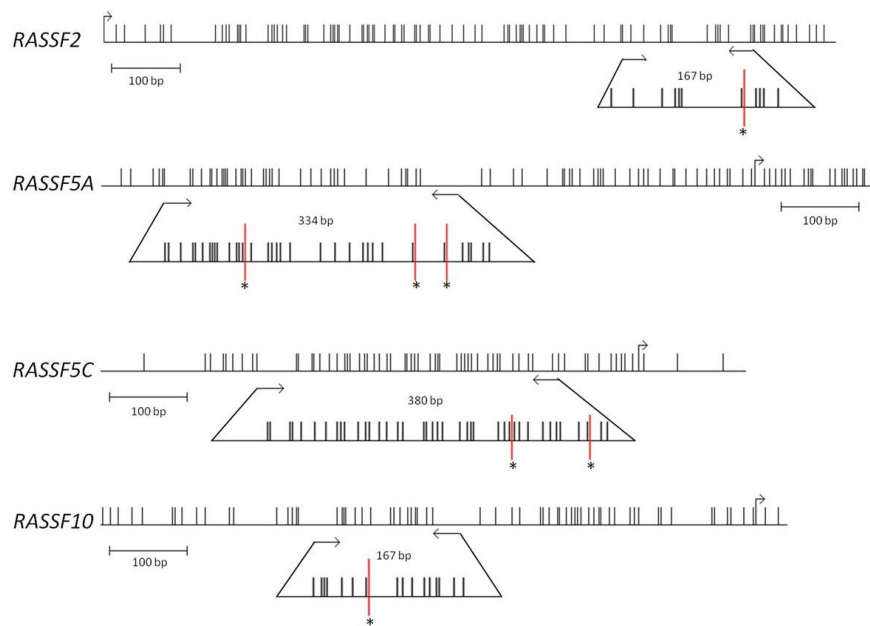

**Table S1.** Primer and PCR conditions.

| Primer  |       | 5'–3'                           | PCR product size in bp | Restriction fragments |
|---------|-------|---------------------------------|------------------------|-----------------------|
| RASSF2  | Upper | GATGGGAAGGYGTTTTATTTTATTTT      | 167                    | 111 + 56              |
|         | Lower | AAAACATAAACCTACCTCTAAAAAATCC    |                        |                       |
| RASSF5A | Upper | GGATAGTTTTGTTAGTTTTTGGAGGTATT   | (363)                  | 94 + 140 + 26 + 74    |
|         | Lower | ACCCTAAACCTTCAACCCTACCTCTT      | 334                    |                       |
|         | Upper | GGTTTTGAGGAATTTTGTAGAGGAA       |                        |                       |
| RASSF5C | Upper | AGGAAGTGGTTTTAGAATTGTTTTA       | (380)                  | 221 + 63 + 38         |
|         | Lower | AAAAAAAATAAACACCCCTCCCC         | 322                    |                       |
|         | Lower | TAAACCCTAACTCTAAACCCC           |                        |                       |
| RASSF10 | Upper | ATAAGTAGAGGAGTTAGTAGGTTAAAGGAGA | 241                    | 50 + 91 + 100         |
|         | Lower | GTGGAGGGATTTTTGAATTTTTTTT       | 167                    |                       |

**Table S2.** Tissue number, type of MCC (primary or recurrence), MCPyV and methylation status.

| No  | Patient | Tumor | Sample | Origin | MCPyV | RASSF2 | RASSF5A | RASSF5C | RASSF10 |
|-----|---------|-------|--------|--------|-------|--------|---------|---------|---------|
| MCC | 1       | 1     |        | P      | +     | -      | -       | -       | +       |
| MCC | 3       | 2     |        | P      | +     | -      | -       | -       | +       |
| MCC | 6       | 3     |        | P      | +     | -      | -       | -       | 0       |
| MCC | 7       | 4     |        | R      | 0     | -      | -       | -       | 0       |
| MCC | 8       | 5     |        | P      | +     | -      | -       | -       | +       |
| MCC | 9       | 6     |        | P      | +     | -      | -       | -       | +       |
| MCC | 10      | 7     |        | P      | +     | -      | -       | -       | +       |
| MCC | 11      | 8     |        | P      | +     | -      | -       | -       | 0       |
| MCC | 13      | 9     |        | P      | +     | -      | -       | -       | +       |
| MCC | 14      | 10    | 1      | R      | +     | -      | -       | -       | +       |
| MCC | 15      |       | 2      | R      | +     | -      | -       | 0       | 0       |
| MCC | 16      | 11    |        | P      | 0     | -      | -       | -       | +       |
| MCC | 17      | 12    |        | P      | +     | -      | -       | -       | 0       |
| MCC | 18      | 13    |        | P      | +     | -      | -       | -       | +       |
| MCC | 20      | 14    |        | P      | +     | 0      | -       | 0       | 0       |
| MCC | 21      | 15    |        | P      | +     | 0      | 0       | 0       | 0       |
| MCC | 22      | 16    |        | P      | +     | -      | +       | 0       | 0       |
| MCC | 23      | 17    |        | P      | +     | 0      | 0       | -       | 0       |
| MCC | 24      | 18    |        | P      | +     | -      | -       | -       | 0       |
| MCC | 25      | 19    |        | R      | +     | -      | -       | -       | 0       |
| MCC | 26      | 20    |        | P      | 0     | -      | -       | -       | +       |
| MCC | 28      | 21    |        | P      | +     | -      | -       | -       | 0       |
| MCC | 29      | 22    |        | R      | +     | -      | -       | -       | 0       |
| MCC | 30      | 23    |        | P      | +     | 0      | 0       | 0       | +       |
| MCC | 31      | 24    |        | P      | +     | 0      | +       | +       | +       |
| MCC | 33      | 25    |        | P      | +     | -      | -       | -       | 0       |
| MCC | 35      | 26    |        | P      | +     | 0      | 0       | 0       | 0       |
| MCC | 36      | 27    |        | P      | +     | 0      | 0       | 0       | 0       |
| MCC | 37      | 28    |        | R      | +     | 0      | -       | -       | 0       |
| MCC | 38      | 29    |        | P      | +     | 0      | 0       | 0       | 0       |
| MCC | 39      | 30    |        | P      | +     | 0      | 0       | 0       | +       |
| MCC | 40      | 31    |        | R      | +     | -      | -       | -       | 0       |
| MCC | 41      | 32    |        | P      | +     | -      | -       | -       | 0       |
| MCC | 42      | 33    |        | P      | +     | 0      | +       | 0       | 0       |
| MCC | 43      | 34    |        | P      | +     | 0      | +       | 0       | 0       |
| MCC | 44      | 35    |        | R      | +     | -      | -       | -       | 0       |
| MCC | 45      | 36    |        | P      | +     | 0      | -       | -       | -       |
| MCC | 46      | 37    | 1      | P      | +     | -      | 0       | -       | 0       |
| MCC | 47      |       | 2      | R      | +     | -      | 0       | -       | +       |
| MCC | 48      | 38    |        | P      | +     | -      | -       | -       | 0       |
| MCC | 49      | 39    |        | P      | +     | +      | +       | -       | +       |
| MCC | 50      | 40    |        | P      | +     | 0      | 0       | +       | 0       |
| MCC | 51      | 41    |        | R      | +     | 0      | +       | -       | 0       |
| MCC | 52      | 42    |        | R      | +     | -      | +       | 0       | 0       |

Table S2. Cont.

| No    | Patient | Tumor | Sample | Origin | MCPyV | RASSF2 | RASSF5A | RASSF5C | RASSF10 |
|-------|---------|-------|--------|--------|-------|--------|---------|---------|---------|
| MCC   | 54      | 43    |        | U      | +     | 0      | +       | -       | 0       |
| MCC   | 55      | 44    | 1      | U      | +     | -      | -       | -       | 0       |
| MCC   | 56      |       | 2      | U      | +     | -      | +       | -       | 0       |
| MCC   | 57      | 45    |        | U      | +     | -      | -       | -       | +       |
| MCC   | 58      | 46    |        | U      | +     | -      | +       | -       | 0       |
| MCC   | 59      | 47    | 1      | U      | +     | -      | -       | -       | 0       |
| MCC   | 60      |       | 2      | U      | +     | -      | +       | -       | +       |
| MCC   | 61      | 48    |        | U      | +     | 0      | -       | -       | 0       |
| MCC   | 62      | 49    |        | U      | +     | -      | -       | -       | 0       |
| MCC   | 64      | 50    |        | U      | +     | -      | 0       | -       | 0       |
| MCC   | 65      | 51    |        | U      | +     | -      | -       | -       | 0       |
| MCC   | 67      | 52    |        | U      | +     | 0      | -       | -       | 0       |
| MCC   | 68      | 53    |        | U      | +     | 0      | -       | -       | 0       |
| MCC   | 69      | 54    |        | U      | +     | -      | -       | -       | 0       |
| MCC   | 70      | 55    |        | U      | +     | 0      | -       | -       | 0       |
| MCC   | 71      | 56    |        | U      | +     | 0      | 0       | -       | 0       |
| MCC   | 72      | 57    | 1      | U      | +     | 0      | -       | -       | 0       |
| MCC   | 73      |       | 2      | U      | +     | 0      | 0       | -       | 0       |
| MCC   | 75      | 58    |        | U      | +     | -      | -       | -       | 0       |
| MCC   | 77      | 59    | 1      | 1      | P     | +      | -       | -       | 0       |
| MCC   | 78      |       | 1      | 2      | P     | 0      | 0       | -       | +       |
| MCC   | 79      |       | 2      | 1      | R     | +      | -       | -       | 0       |
| MCC   | 81      | 60    |        | P      | +     | 0      | 0       | -       | 0       |
| MCC   | 84      | 61    |        | U      | +     | -      | -       | -       | 0       |
| MCC   | 85      | 62    |        | P      | 0     | 0      | 0       | 0       | 0       |
| MCC   | 86      | 63    |        | P      | +     | 0      | 0       | -       | 0       |
| MCC   | 87      | 64    |        | P      | +     | -      | -       | -       | 0       |
| MCC   | 88      | 65    |        | P      | 0     | 0      | 0       | -       | 0       |
| MCC   | 89      | 66    |        | P      | +     | -      | -       | -       | 0       |
| MCC   | 90      | 67    |        | P      | 0     | 0      | 0       | 0       | 0       |
| MCC   | 91      | 68    |        | P      | +     | +      | 0       | 0       | 0       |
| MCC   | 92      | 69    |        | P      | +     | 0      | -       | -       | +       |
| MCC   | 93      | 70    |        | P      | +     | 0      | -       | -       | 0       |
| MCC   | 94      | 71    |        | P      | +     | 0      | 0       | 0       | 0       |
| MCC   | 95      | 72    |        | P      | +     | 0      | +       | 0       | 0       |
| MCC   | 96      | 73    | 1      | 1      | P     | +      | 0       | +       | 0       |
| MCC   | 97      |       | 1      | 2      | P     | +      | 0       | +       | 0       |
| MCC   | 98      | 74    |        | P      | +     | 0      | +       | 0       | 0       |
| MCC   | 99      | 75    |        | P      | +     | 0      | 0       | 0       | -       |
| MCC   | 100     | 76    |        | P      | +     | +      | 0       | 0       | 0       |
| MCC   | 101     | 77    |        | U      | +     | 0      | +       | 0       | 0       |
| MCC   | 102     | 78    |        | U      | +     | 0      | +       | 0       | 0       |
| MCC   | 103     | 79    |        | P      | +     | 0      | -       | -       | -       |
| Contr | NH1     |       |        |        | 0     | 0      | +       | 0       | 0       |
| Contr | NH5     |       |        |        | 0     | -      | -       | -       | 0       |

Table S2. Cont.

| No    | Patient | Tumor | Sample | Origin | MCPyV | RASSF2 | RASSF5A | RASSF5C | RASSF10 |
|-------|---------|-------|--------|--------|-------|--------|---------|---------|---------|
| Contr | NH6     |       |        |        | 0     | 0      | 0       | 0       | 0       |
| Contr | NH7     |       |        |        | 0     | -      | 0       | -       | 0       |
| Contr | NH8     |       |        |        | 0     | 0      | +       | 0       | 0       |
| Contr | NH9     |       |        |        | +     | 0      | +       | 0       | 0       |
| Contr | NH10    |       |        |        | 0     | 0      | 0       | 0       | 0       |
| Contr | NH12    |       |        |        | 0     | -      | -       | -       | 0       |
| Contr | NH13    |       |        |        | +     | -      | -       | 0       | -       |
| Contr | NH15    |       |        |        | +     | -      | -       | 0       | -       |
| Contr | NH16    |       |        |        | 0     | 0      | -       | -       | 0       |
| Contr | NH18    |       |        |        | +     | -      | -       | 0       | -       |
| Contr | NH19    |       |        |        | 0     | -      | -       | -       | 0       |
| Contr | NH21    |       |        |        | 0     | 0      | -       | -       | -       |
| Contr | NH22    |       |        |        | +     | -      | 0       | 0       | -       |
| Contr | NH23    |       |        |        | +     | -      | -       | 0       | -       |
| Contr | NH24    |       |        |        | 0     | 0      | -       | -       | 0       |
| Contr | NH27    |       |        |        | +     | -      | -       | 0       | 0       |
| Contr | NH29    |       |        |        | 0     | 0      | -       | -       | 0       |
| Contr | NH30    |       |        |        | 0     | -      | -       | -       | 0       |

MCC = Merkel cell carcinoma; Contr = normal tissue; P = primary carcinoma; R = recurrence;

U = uncertain; + = positive; 0 = negative; - = not analyzed.
